# Supplementary material for: A Comparison of Young Children's Self-Selected Reading Words and Basal Reading Words.
Source: Oxford University Press journal article supplement (doi:10.1242/jcs.183889), 1983-01-01
Supplement: jcs183889supp.pdf [file jcs183889supp.pdf]

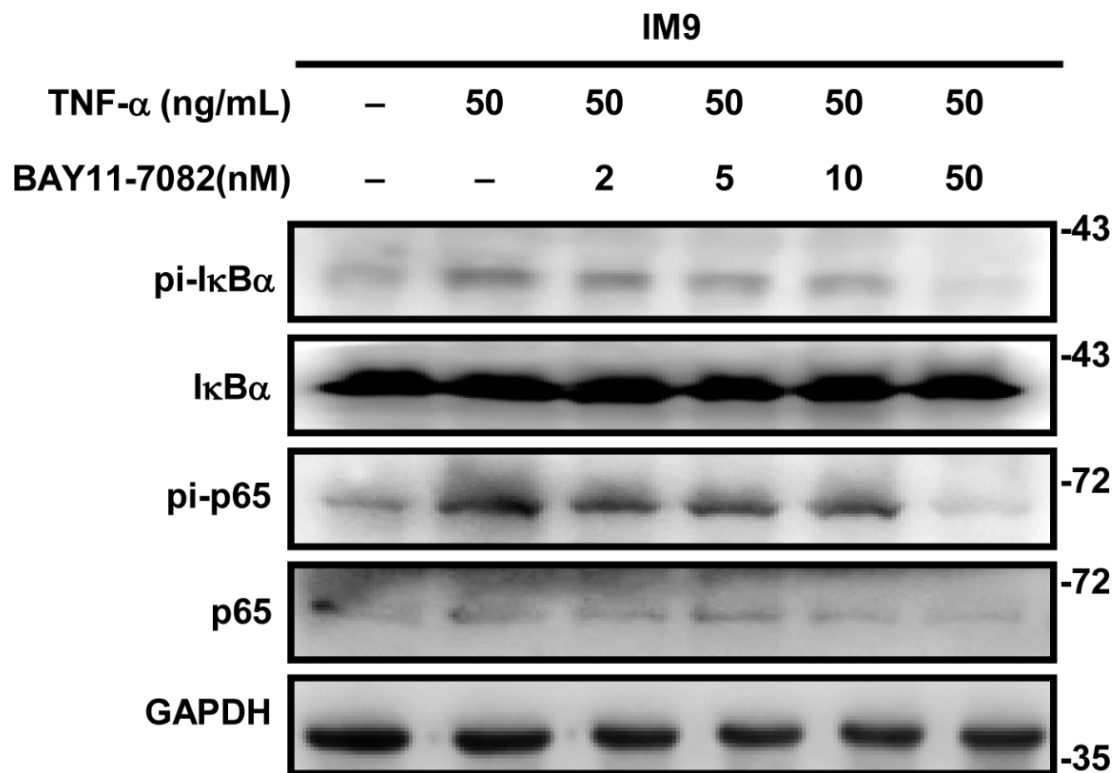

**Figure S1. BAY11-7082 inhibits TNF- $\alpha$ -induced NF- $\kappa$ B activation.** IM9 cells were cultured without serum for 48 hours before pretreatment with BAY11-7082 (0, 2, 5, 10 or 50 nM) for 1 hour followed by stimulation for 20 minutes in the presence or absence of TNF- $\alpha$  (50 ng/mL). Activity of NF- $\kappa$ B signaling was examined by Western blot. Data are representative of three independent experiments.

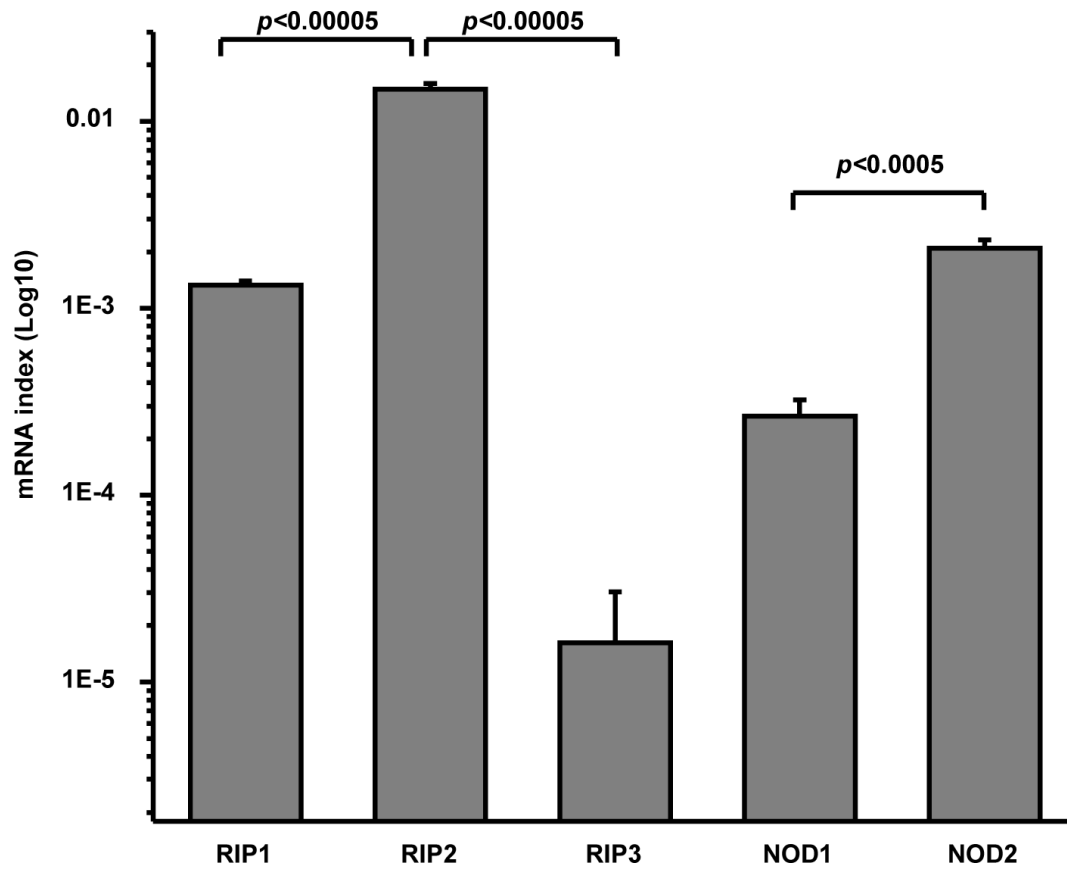

**Figure S2. Expression of RIP1-3, NOD1 and NOD2 in IM9 cells.**Real-time PCR for mRNA levels of RIP1, RIP2, RIP3, NOD1 and NOD2 in IM9 cells. Data are representative of three independent experiments.

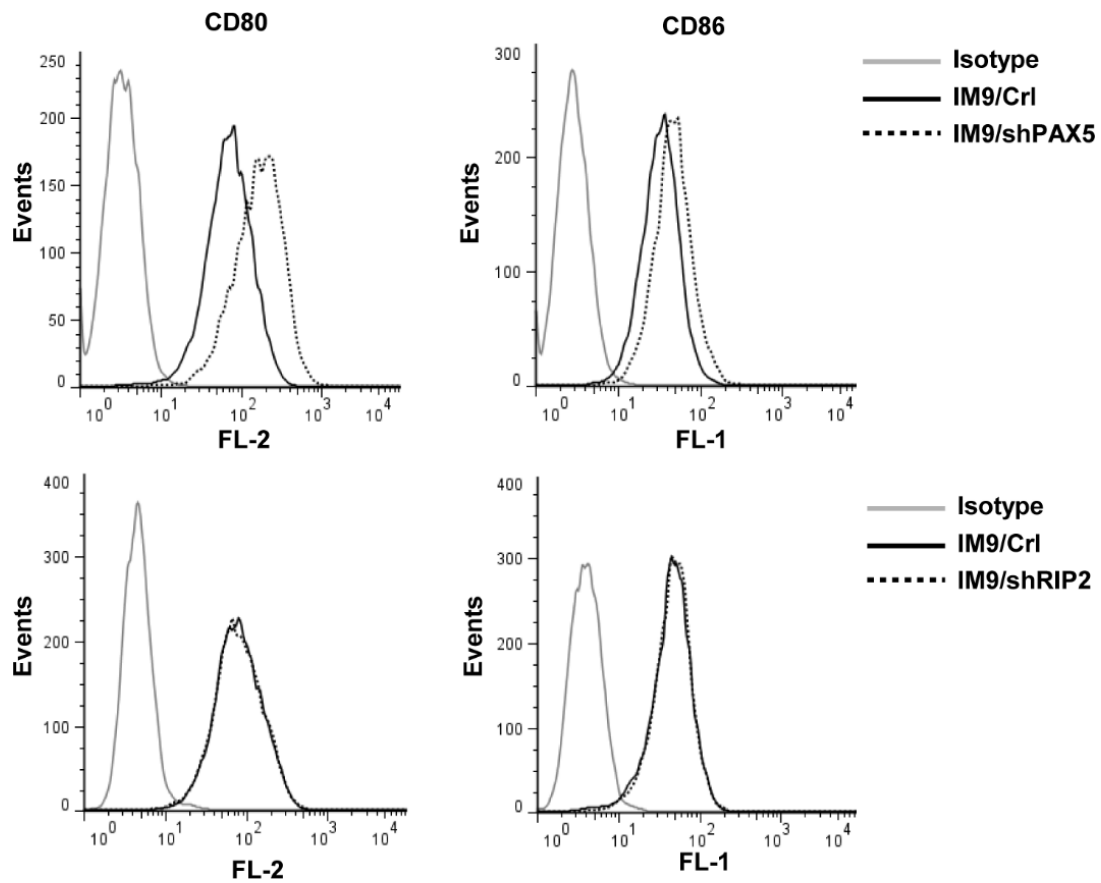

**Figure S3. PAX5 downregulation enhances expression of cell surface molecules in IM9 cells.** Flow Cytometry for CD80, CD86 level on IM9/CrI, IM9/shPAX5 and IM9/shRIP2 cell surface. Data are representative of three independent experiments
